# Supplementary material for: Exceptionally stable sol-immobilization derived Pd/SBA-15 catalysts for methane combustion
Source: Royal Society of Chemistry journal article supplement (doi:10.1039/d1cy00086a), 2021-01-01
Supplement: d1cy00086a1.pdf [file d1cy00086a1.pdf]

Supporting Information

## Exceptional Stability of Sol-immobilization Derived Pd/SBA-15 Catalyst for Methane Combustion

Palle Ramana Murthy\*, Jing-Cai Zhang, Wei-Zhen Li

CAS Key Laboratory of Science and Technology on Applied Catalysis, Dalian Institute of  
Chemical Physics, Chinese Academy of Sciences, Dalian 116023, China.

\* Corresponding author: [ramanapalle1@gmail.com](mailto:ramanapalle1@gmail.com)

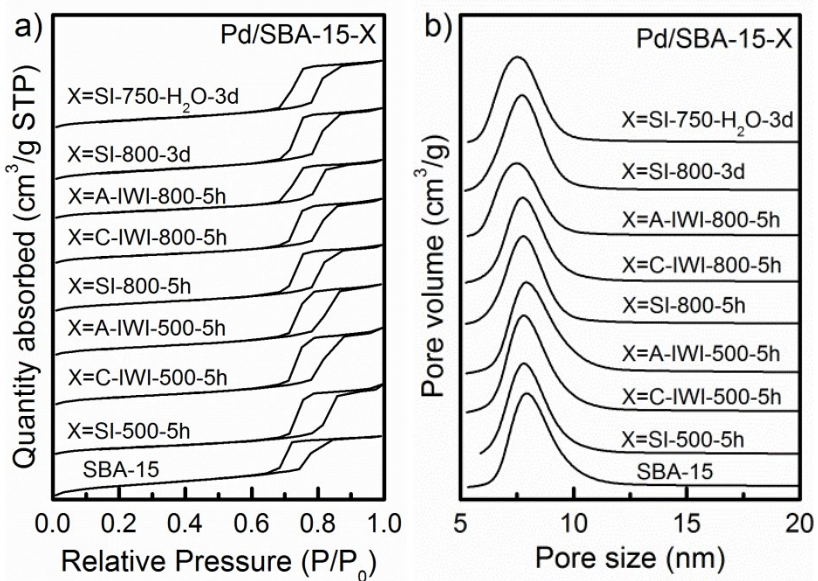

Fig. S1. N<sub>2</sub> adsorption-desorption isotherms of Pd/SBA-15-X (a) and pore size distributions (b).

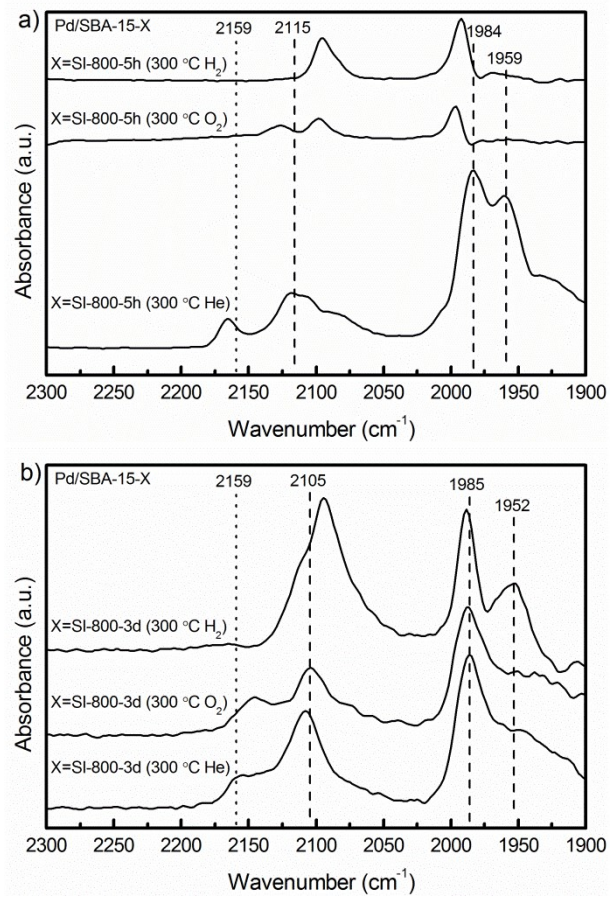

**Fig. S2.** In situ DRIFT spectra of CO adsorption on SI-800-5h (a), SI-800-3d (b) (before CO adsorption, catalysts were pretreated in a different atmosphere)
